# Supplementary material
Source: Frontiers journal article supplement (https://www.frontiersin.org/articles/461131)
Supplement: Data_Sheet_3.xlsx [file Data_Sheet_3.xlsx]

## Sheet: Sheet1
Supplementary Data 3.
Records of fishes species reported from mesophotic and rariphotic depths (30-300 m) in Smith-Vaniz et al. (1999) (SV), Smith-Vaniz and Collette (2013) (SC), Pinheiro et al. (2016) (P), the present study, and new museum records at BAMZ, Academy of Natual Science Philadelphia (ANSP)
Field Museum of Natural History (FMNH), University of Florida Natural History Musem (UF), and drop camera surveys by SRS and JP. Records were segregated by geographic locations
but the sites of the present study (N) (i.e. North Northeast, Spittal, Tiger) are separate, except for Plantagent Bank were all records are reported together. Several sharks caught at the surface are included as they are known to forage at depth.
We discounted records of Gempylidae, Scombridae, Scombrolabracidae, and other primarily pelagic fishes. The records were binned into these geogrpahic areas: PL (Plantagenet Bank)
NNE (North Northeast), SP (Spittal), TIG (Tiger), CHALL (Challenger Bank), NW (Chub Heads to North Rock), NE (North Rock to Kitchen Shoal), SE (Kitchen shoal to Castle Roads),
SS (Castle Roads to Hungry Bay), SW (Hungry Bay to Chub heads).
For the Pinheiro et al. (2016) data only, we do not report location or depth, since these were not explicitly provided in their study. Nevertheless, all their fish observations lied between 50-80 m.
Species	Common name	Family	PL	NNE	SP	TIG	Chall	NW	SW	NE	SE	SS	Depth range (m) including only mesophotic or deeper records	Source	Total mesophotic and rariphotic records from Bermuda based on present study
Acanthurus bahianus*	Ocean surgeon	Acanthuridae											55‒63	N, P	Y
Acanthurus chirurgus*	Doctorfish	Acanthuridae	Y	Y		Y		Y					51‒63	SV, N, P	Y
Alectic ciliaris	African pompano	Carangidae							Y				37	SV
Alepisaurus ferox	Longnose lancetfish	Alepisauridae									Y		63‒640	SV
Aluterus monoceros	Unicorn filefish	Monacanthidae					Y						54	SV
Amblycirrhitus pinos	Redspotted hawkfish	Cirrhitidae	Y										57	SV
Antennarius ocellatus	Ocellated frogfish	Antennariidae										Y	54	SV
Anthias tenuis	Threadnose bass	Serranidae					Y	Y					54‒60	SV, ANSP
Antigonia capros	Deepbody boarfish	Caproidae										Y	474	SV
Apogon gouldi	Deepwater cardinalfish	Apogonidae						Y					55	SV
Aulopus filamentosus	Yellowfin aulopus	Aulopidae										Y	274‒548	SC
Aulostomus maculatus	Trumpetfish	Aulostomidae					Y						55‒83	SV
Aulostomus strigosus	Trumpetfish	Aulostomidae												P
Balistes capriscus	Gray tiggerfish	Balistidae	Y										55	SV
Bodianus pulchellus	Spotfin hogfish	Labridae	Y				Y	Y			Y	Y	55‒90	SV, P
Bodianus rufus	Spanish hogfish	Labridae	Y			Y	Y						47‒90	SV, N, P	Y
Bothus lunatus	Peacock flounder	Bothidae						Y					51‒54	SV
Brotula barbata	Bearded brotula	Ophidiidae										Y	90	SV
Cantherhines macrocerus	Whitespotted filefish	Monacanthidae	Y							Y			51‒93	SV, N	Y
Cantherhines pullus	Orangespotted filefish	Monacanthidae					Y						49	SV
Canthigaster rostrata	Sharpnose puffer	Tetraodontidae		Y		Y						Y	47‒93	UF, N, P	Y
Caranx latus	Horse-eye jack	Carangidae	Y										120	SV
Caranx lugubris	Black jack	Carangidae	Y										186‒250	N, P	Y
Caranx ruber	Bar jack	Carangidae					Y						55	SV
Carcharhinus falciformis	Silky shark	Carcharhinidae					Y	Y					33	SV
Carcharhinus galapagenis	Galapagos shark	Carcharhinidae			Y		Y						surface	SV
Caulolatilus bermudensis	Bermuda tilefish	Malacanthidae						Y	Y			Y	237‒411	SV
Centropyge argi	Cherubfish	Pomacanthidae	Y				Y						54‒170	SV, P
Cephalopholis fulva	Coney	Serranidae	Y			Y	Y						48‒97	SV, FMNH, N, P	Y
Chaetodon ocellatus	spotfin butterflyfish	Chaetodontidae					Y					Y	47‒51	SV
Chaetodon sedentarius	Reef butterflyfish	Chaetodontidae	Y	Y		Y	Y						45‒106	SV, N, P	Y
Channomuraena vittata	Broadbanded eel	Muraenidae						Y			Y		27‒36	SV
Chlopsis dentatus	Mottled false moray	Chlopsidae										Y	155	SV
Chloroscombrus chrysurus	Atlantic bumper	Carangidae		Y									60	N	Y
Chromis bermudae	Yellowfin chromis	Pomacentridae	Y	Y		Y	Y						52‒90	SV, N, P	Y
Chromis enchrysura	Yellowtail reeffish	Pomacentridae	Y	Y		Y	Y					Y	56‒92	SV, N, P	Y
Chromis insolata	Sunshinefish	Pomacentridae					Y				Y	Y	70‒85	SV
Clepticus parrae	Creole wrasse	Labridae				Y						Y	47‒62	UF, N	Y
Conger esculentus	Antillean conger	Congridae										Y	165‒640	SV
Conger triporiceps	Manytooth conger	Congridae										Y	164	SV
Cookeolus japonicus	Bulleye	Priacanthidae	Y					Y					90‒93, 640‒720	N, SV	Y
Coryphopterus sp.		Gobiidae												P
Dactylopterus volitans	Flying gurnard	Dactylopteridae	Y				Y						57	SV
Decapterus tabl	Redtail scad	Carangidae						Y					200	SV
Decodon puellaris	Red hogfish	Labridae	Y				Y	Y				Y	64‒365	SV
Diplodus bermudensis	Bream	Sparidae												P
Epinephelus adscensionis	Rock hind	Serranidae						Y					51	SV
Epinephelus drummondhayi	Speckled hind	Serranidae											146‒182	SV
Epinephelus guttatus	Red hind	Serranidae					Y						58	SV
Epinephelus morio	Red grouper	Serranidae	Y										50	SV
Epinephelus mystacinus	Misty grouper	Serranidae	Y				Y				Y	Y	146‒217	SV
Epinephelus niveatus	Snowy grouper	Serranidae						Y					180‒329	SV
Epinephelus striatus	Nassau grouper	Serranidae					Y		Y				36‒55	SV
Etelis oculatus	Queen snapper	Lutjanidae							Y				146‒274	SV
Galeocerdo cuvier	Tiger shark	Carcharhinidae					Y						91	SV
Gephyroberyx darwinii	Big roughie	Trachicthyidae											299‒301	N	Y
Gymnothorax maderensis**	Sharktooth moray	Muraenidae											~300	N
Gymnothorax moringa	Spotted moray	Muraenidae												P
Gymnothorax polygonius	Polygon moray	Muraenidae							Y				200	SV
Haemulon flavolineatum	French grunt	Haemulidae												P
Halichoeres bathyphilus	Greenband wrasse	Labridae					Y						106	SV
Halichoeres garnoti	Yellowhead wrasse	Labridae						Y					51‒80	SV, P
Halichoeres radiatus	Puddingwife	Labridae						Y					45‒65	SV, P
Heteroconger longissimus	Brown garden eel	Congridae										Y	55	SRS/JP
Holacanthus bermudensis	Blue angelfish	Pomacanthidae	Y			Y							61‒201	N, P	Y
Holocanthus tricolor	Rock beauty	Pomacanthidae	Y	Y		Y	Y				Y		47‒105	SV, N, P	Y
Holocentrus adscensionis	Squirrelfish	Holocentridae		Y	Y	Y							61‒150	N, P	Y
Holocentrus rufus	Longspine squirrelfish	Holocentridae												P
Hoplostethus occidentalis	Atlantic roughy	Trachicthyidae					Y						60‒823	SV
Isurus oxyrinchus	Shortfin mako	Lamnidae							Y				surface	SV
Kyphosus insicor***	Yellow sea chub	Kyphosidae	Y										92‒93	N	Y
Kyphosus sectatrix***	Bermuda sea chub	Kyphosidae	Y										92‒93	N, P	Y
Lactophrys triqueter	Smooth trunkfish	Ostraciidae								Y			51‒55	SV
Laemonema yarrellii	Codling	Moridae							Y				237‒1646	SV
Lutjanus analis	Mutton snapper	Lutjanidae												P
Lutjanus buccanella	Blackfin snapper	Lutjanidae										Y	109	SV
Lutjanus vivanus	Silk snapper	Lutjanidae										Y	55	SV
Lythrypnus mowbrayi	Mowbray's goby	Gobiidae					Y						49	SV
Lythrypnus spilus	Bluegold goby	Gobiidae					Y						49	SV
Malacanthus plumieri	Sand tilefish	Malacanthidae						Y		Y	Y	Y	51‒109	SV
Melichthys niger	Black durgon	Balistidae	Y										55	N	Y
Mobula birostris	Manta ray	Myliobatidae	Y										250	SV
Mustelus canis insularis	Gummy shark	Triakidae				Y	Y	Y	Y				60, 243‒768	SV, N	Y
Mycteroperca bonaci	Black grouper	Serranidae						Y		Y			30-40	TW, JP, CLS
Mycteroperca interstitialis	Yellowmouth grouper	Serranidae					Y				Y		45‒160	SV, P
Mycteroperca venenosa	Yellowfin grouper	Serranidae					Y						45‒55	SV
Myripristis jacobus	Blackbar soldierfish	Holocentridae					Y						45‒60	SV
Nemaclinus atelestos	Threadfin blenny	Labrisomidae					Y						355‒110	SV
Ostichthys trachypoma	Bigeye soldierfish	Holocentridae				Y							304‒305	N	Y
Paranthias furcifer	Creole-fish	Serranidae	Y	Y		Y	Y						45‒93	SV, N, P	Y
Parasphyraenops atrimanus	Bank bass	Serranidae	Y										79	SV
Phaeoptyx conklini	Freckled cardinalfish	Apogonidae					Y						55	SV, FMNH
Plectrypops retrospinis	Cardinal soldierfish	Holocentridae									Y		49‒182	SV
Polymixia lowei	Beardfish	Polymixiidae						y	Y				274‒512	SV
Polymixia nobilis	Stout beardfish	Polymixiidae					Y						365	SV
Polyprion americanus	Wreckfish	Polyrionidae					Y						300‒400	SV
Pontinus castor	Longsnout scorpionfish	Scorpaenidae	Y			Y	Y	Y		Y		Y	109‒305	SV, N	Y
Priacanthus arenatus	Bigeye	Priacanthidae	Y				Y						55‒105	SV
Prionace glauca	Blue shark	Carcharhinidae					Y						surface	SV
Pristigenys alta	Short bigeye	Priacanthidae	Y	Y	Y		Y		Y				54‒301	N, SV	Y
Pristipomoides macrophthalmus	Cardinal snapper	Lutjanidae										Y	219‒360	SV
Prognathodes aculeatus	Longsnout butterflyfish	Chaetodontidae	Y				Y				Y	Y	54‒85	SV, UF
Prognathodes cf. guyanensis	French butterflyfish	Chaetodontidae	Y	Y	Y	Y							90‒302	N	Y
Pronotogrammus martinicensis	Roughtongue bass	Serranidae	Y	Y	Y	Y	Y				Y		73‒337	N, SV	Y
Pseudocaranx dentex	White trevally	Carangidae				Y	Y						50‒80	SV, N, P	Y
Pseudupeneus maculatus	Spotted goatfish	Mullidae	Y				Y						45‒65	SV, P
Pterois miles****	Devil firefish	Scorpaenidae	Y	Y	Y	Y							55‒301	N	Y
Pterois volitans****	Red lionfish	Scorpaenidae	Y	Y	Y	Y					Y	Y	45‒301	SC, N, P	Y
Pteroplatytrygon violacea	Pelagic sting ray	Dasyatidae							Y		Y		64	SV
Regalecus glesne	Oarfish	Regalecidae					Y						73	SV
Rypticus saponaceus	Greater soapfish	Serranidae					Y						55‒90	SV, SRS/JP, P
Sargocentron bullisi	Deepwater squirrelfish	Holocentridae						Y					56‒90	SV, P
Scarus guacamaia	Rainbow parrotfish	Scaridae									Y		48	JP
Scarus taeniopterus	Princess parrotfish	Scaridae				Y				Y	Y		51‒80	SV, N, P	Y
Scarus vetula	Queen parrotfish	Scaridae												P
Scorpaena albifimbria	Coral scorpionfish	Scorpaenidae	Y										50	SV
Scorpaena isthmensis	Smoothcheek scorpionfish	Scorpaenidae					Y						60	SV
Seriola dumerili	Greater amberjack	Carangidae	Y				Y						53‒67	SV
Seriola fasciata	Lesser amberjack	Carangidae					Y	Y			Y		30‒200	SV
Seriola rivoliana	Almaco jack	Carangidae	Y		Y	Y	Y				Y		48‒251	SV, N, P	Y
Serranus annularis	Orangeback bass	Serranidae						Y					55	SV, ANSP
Serranus phoebe	Tattler	Serranidae	Y	Y	Y	Y		Y			Y	Y	60‒305	SV, BAMZ, N	Y
Sparisoma atomarium	Greenblotch parrotfish	Scaridae					Y						54	SV
Sparisoma aurofrenatum	Redband parrotfish	Scaridae												P
Sparisoma chrysopterum	Redtail parrotfish	Scaridae								Y	Y		51‒65	SV, P
Sparisoma rubripinne	Redfin parrotfish	Scaridae		Y									60	N	Y
Sparisoma viride	Stoplight parrotfish	Scaridae				Y							45‒62	N, P	Y
Sphyraena barracuda	Great barracuda	Sphyraenidae									Y		55	SV
Squalus cubensis	Cuban dogfish	Squalidae	Y										185‒201	N	Y
Syacium papillosum	Dusky flounder	Paralichthyidae							Y				118	SV
Uraspis secunda	Cottonmouth jack	Carangidae	Y				Y				Y		40‒60	SV
Uropterygius macularius	Marbled moray	Muraenidae								Y			33	SV
Xanthichthys ringens	Sargassum triggerfish	Balistidae	Y					Y				Y	51‒80	SV, SRS, N, P	Y
Totals			42	16	9	24	52	25	12	8	21	26			36
*Recorded as Acanthurus bahianus/chirurgus in the present study
**Casual observation
***Recorded as Kyphosus incisor/sectatrix in the present study
****Recorded as Pterois miles/volitans in the present study
